# Supplementary material for: Arabidopsis SAG protein containing the MDN1 domain participates in seed germination and seedling development by negatively regulating ABI3 and ABI5
Source: PubMed Central journal article supplement (PMC3883281; doi:10.1093/jxb/ert343), 2013-10-25

## Legends for supplemental data

**Table S1** The list of primers used in this study. F and R indicate forward and reverse primers.

**Fig. S1** The BlastP between AtSAG and other homologous proteins from *Glycine max* (XP\_003522398.1), *Vitis vinifera* (XP\_002282819.2), and *Ricinus communis* (XP\_002515436.1). The asterisk marked letters indicates the VWA domain components, the straight lines indicate regions of AAA and VWA domains in MDN1 domain, and the black arrow indicates the T-DNA insertion site.

**Fig. S2** The protein accumulation of ABI3 and ABI5 in WT and *sag* mutant seeds germinated for 2.5-day on 1/2 MS with or without 0.5  $\mu$ M ABA. The black arrows in the right side indicate ABI3 and ABI5, respectively. – and + indicate without and with 0.5  $\mu$ M ABA, respectively.

**Fig. S3** The expression analysis of *AtSAG* in *abi5* germinated seeds compared to WT.

**Fig. S4** The expression analysis of *AtSAG* in *mapk4* and 35S:MKS1 plants by genevestigator analysis (A), and the expression of MAPK4 in WT and *sag* mutant seeds germinated for 2.5-day on 1/2 MS with or without 0.5  $\mu$ M ABA (B).

**Fig. S5** The SDS-PAGE of coimmunoprecipitated proteins from 35S:AtSAG-GFP and 35S:GFP seeds germinated for 2.5-day on 1/2 MS with 0.5  $\mu$ M ABA. 1 and 2 indicated two independent repeats. The sequenced bands were marked in red box.

## Supplementary data

**Table S1** The list of primers used in this study.

| Primer Name | Primer Sequence        |
|-------------|------------------------|
| NCED3-F     | GCTGCGGTTTCTGGGAGAT    |
| NCED3-R     | GTCGGAGCTTTGAGAAGACGAT |
| NCED5-F     | CCTCCGTTAGTTTCACCAACT  |
| NCED5-R     | GGTGTGTCGGAGACGGAGTT   |
| CYC707A1-F  | CTCACTCTCTTCGCCGGAAG   |
| CYC707A1-R  | GGAGGGAGTGGGAGTTTGAA   |
| CYC707A2-F  | CGTCTCTCACATCGAGCTCCTT |
| CYC707A2-R  | GAGGGTGTGATGGACTTTTGG  |
| ABI3-F      | TACTCCGTTTGTGTTCTCAG   |
| ABI3-R      | GTTTCTCCGATTGGGTTTGG   |
| ABI5-F      | AACCTAATCCAACCCGAACC   |
| ABI5-R      | ACCCTCCTCCTCCTGTCC     |
| EM1-F       | TCAAATGGTATGCGGTTATG   |
| EM1-R       | TATCACAAGTAAGACACGAAG  |
| EM6-F       | TGTCTCGTTTGTTCCTCAG    |
| EM6-R       | CACTATGTTGAGAATCCAC    |
| RD29A-F     | TGATCGATGCACCAGGCGTAAC |
| RD29A-R     | CCCTGGTGGAATAATTCCTCCG |
| RAB18-F     | GAGCACCACGAGAAGAAGG    |
| RAB18-R     | GCACAATACAACGACCGAATG  |
| ATS1-F      | ATTACGGACTTAGTGTTT     |
| ATS1-R      | CTTGTGTATGTTGTGTATG    |
| Ole2-F      | CCACTATTTCTCCTCTTC     |
| Ole2-R      | TTCTCCTCTTAGCATACT     |
| Ole4-F      | AACTACGAAGATGATGTC     |
| Ole4-R      | GCTATAAGTGCCAAGATT     |
| At3G22640-F | AAGGACAAGAAGAAGAAG     |
| At3G22640-R | CGAGAGTATAGTGAATGG     |
| At4G36700-F | GCTGTTATCTTGGAATGT     |
| At4G36700-R | CTTCTCTTCTTCTTCTCA     |
| At2S4-F     | CCAATACAGAAATGTCAGA    |
| At2S4-R     | GATGTCGTCTCCATATC      |

Fig. S1

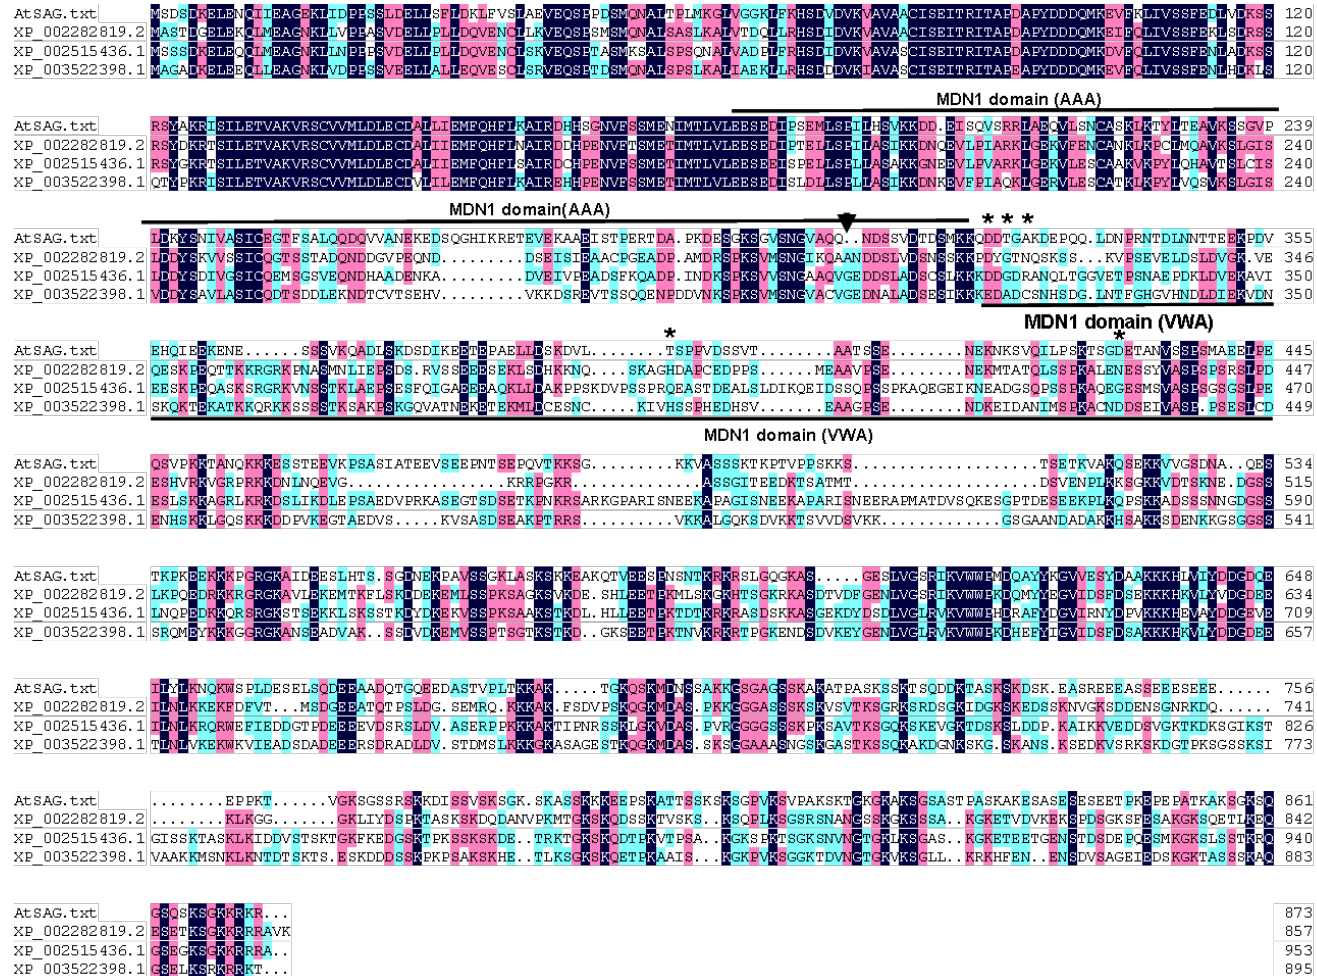

Fig. S2

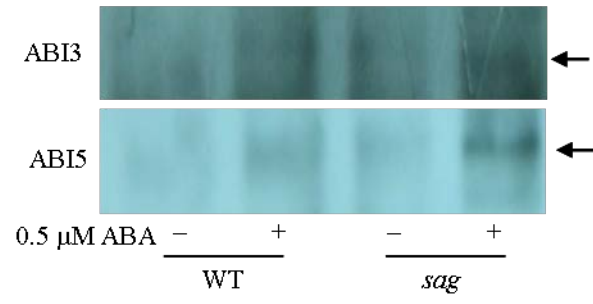

Fig. S3

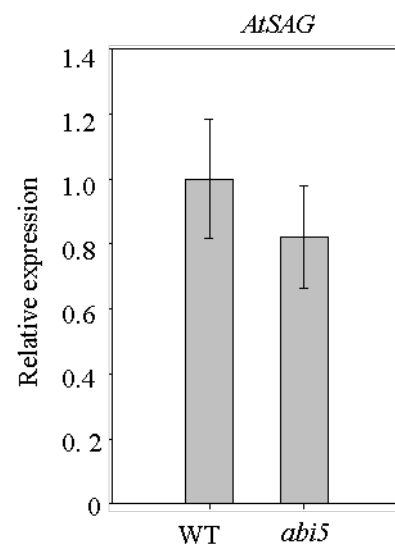

Fig. S4

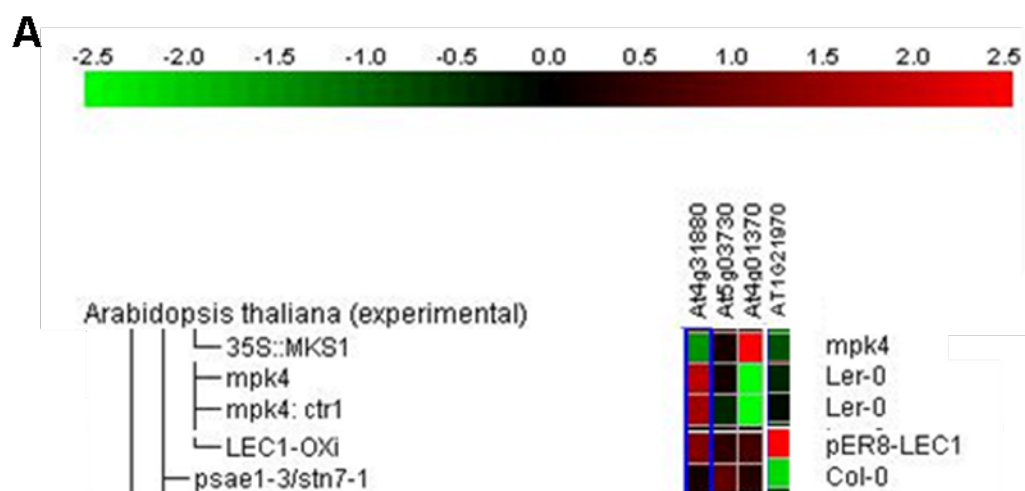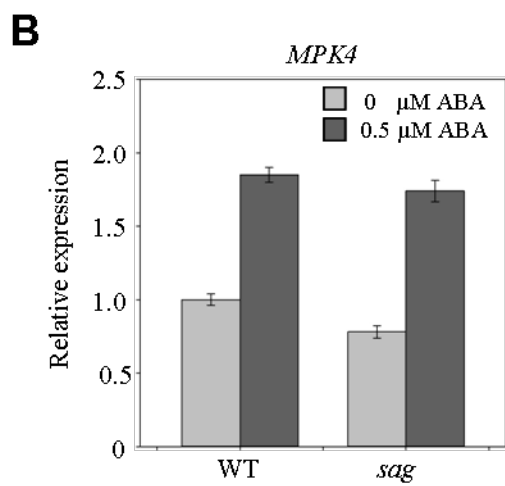

Fig. S5

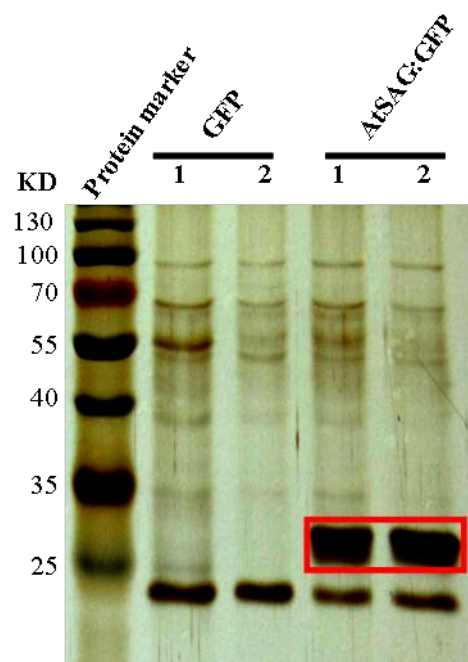

Supplement: supp_ert343_jexbot100198_file001.pdf [file supp_ert343_jexbot100198_file001.pdf]
